# Supplementary material for: High-Resolution Anorectal Manometry as a Screening Tool for Hirschsprung’s Disease: A Comprehensive Retrospective Analysis
Source: MDPI journal article supplement (doi:10.3390/jcm13051268), 2024-02-23
Supplement: s1 [file s1]

# Supplementary Materials

Presenting additional results—Table S1 and Table S2—patient distribution and HR-ARM and CE performance in patient who underwent both tests. Below we present tables with 95% CI for each patient group—graphical presentation in main body of the manuscript

**Table S1.** Contingency table for patients undergoing both HR-ARM and CE.

|     | HR-ARM |        | CE |        |
|-----|--------|--------|----|--------|
|     | HD     | non-HD | HD | non-HD |
| POS | 13     | 9      | 11 | 9      |
| NEG | 1      | 37     | 3  | 37     |

**Table S2.** HR-ARM and CE performance in patients undergoing both HR-ARM and CE.

|        | n  | Sensitivity | Specificity | PPV    | NPV    |
|--------|----|-------------|-------------|--------|--------|
| HR-ARM | 60 | 92.85%      | 80.43%      | 59.09% | 97.36% |
| CE     | 60 | 78.57%      | 80.43%      | 55.0%  | 92.5%  |

**Table S3.** Below tables presenting 95% CI for both tests divided into age-groups.

| HR-ARM Total       |        |                   | CE Total           |        |                  |
|--------------------|--------|-------------------|--------------------|--------|------------------|
|                    | value  | 95% CI            |                    | value  | 95% CI           |
| <b>Sensitivity</b> | 0.9375 | 0.7167 to 0.9968  | <b>Sensitivity</b> | 0.7857 | 0.5241 to 0.9243 |
| <b>Specificity</b> | 0.8974 | 0.8293 to 0.9404  | <b>Specificity</b> | 0.8043 | 0.6683 to 0.8935 |
| <b>PPV</b>         | 0.5556 | 0.3731 to 0.7241  | <b>PPV</b>         | 0.55   | 0.3421 to 0.7418 |
| <b>NPV</b>         | 0.9906 | 0.9485 to 0.9995  | <b>NPV</b>         | 0.925  | 0.8014 to 0.9742 |
| HR-ARM ≤12 months  |        |                   | CE ≤12 months      |        |                  |
|                    | value  | 95% CI            |                    | value  | 95% CI           |
| <b>Sensitivity</b> | 0.9167 | 0.6461 to 0.9957  | <b>Sensitivity</b> | 1      | 0.7225 to 1.000  |
| <b>Specificity</b> | 0.9821 | 0.9055 to 0.9991  | <b>Specificity</b> | 0.75   | 0.5050 to 0.8982 |
| <b>PPV</b>         | 0.9167 | 0.6461 to 0.9957  | <b>PPV</b>         | 0.7143 | 0.4535 to 0.8828 |
| <b>NPV</b>         | 0.9821 | 0.9055 to 0.9991  | <b>NPV</b>         | 1      | 0.7575 to 1.000  |
| HR-ARM ≤24 months  |        |                   | CE ≤24 months      |        |                  |
|                    | value  | 95% CI            |                    | value  | 95% CI           |
| <b>Sensitivity</b> | 0.9333 | 0.7018 to 0.9966  | <b>Sensitivity</b> | 0.8462 | 0.5777 to 0.9727 |
| <b>Specificity</b> | 0.9577 | 0.8830 to 0.9885  | <b>Specificity</b> | 0.8095 | 0.6000 to 0.9233 |
| <b>PPV</b>         | 0.8235 | 0.5897 to 0.9381  | <b>PPV</b>         | 0.7333 | 0.4805 to 0.8910 |
| <b>NPV</b>         | 0.9855 | 0.9224 to 0.9993  | <b>NPV</b>         | 0.8947 | 0.6861 to 0.9813 |
| HR-ARM > 24 months |        |                   | CE >24 months      |        |                  |
|                    | value  | 95% CI            |                    | value  | 95% CI           |
| <b>Sensitivity</b> | 1      | 0.05129 to 1.000  | <b>Sensitivity</b> | 0      | 0.000 to 0.9487  |
| <b>Specificity</b> | 0.7955 | 0.6550 to 0.8885  | <b>Specificity</b> | 0.8182 | 0.6148 to 0.9269 |
| <b>PPV</b>         | 0.1    | 0.00512 to 0.4042 | <b>PPV</b>         | 0      | 0.000 to 0.4899  |
| <b>NPV</b>         | 1      | 0.9011 to 1.000   | <b>NPV</b>         | 0.9474 | 0.7536 to 0.9973 |
